1 **Proteome reallocation enables the selective *de novo* biosynthesis of non-linear,**  
2 **branched-chain acetate esters**

3 Hyeonmin Seo<sup>1,2</sup>, Richard J. Giannone<sup>2,3</sup>, Yung-Hun Yang<sup>4</sup>, and Cong T. Trinh<sup>1,2§</sup>

4

5 <sup>1</sup>Department of Chemical and Biomolecular Engineering, The University of Tennessee, Knoxville,  
6 TN, USA

7 <sup>2</sup>Center of Bioenergy Innovation, Oak Ridge National Laboratory, Oak Ridge, TN, USA

8 <sup>3</sup>Chemical Sciences Division, Oak Ridge National Laboratory, Oak Ridge, TN 37830, USA

9 <sup>4</sup>Department of Biological Engineering, Konkuk University, Seoul, Republic of Korea

10

11 <sup>§</sup>Corresponding author. Email: [ctrinh@utk.edu](mailto:ctrinh@utk.edu).

12

## 13 **ABSTRACT**

14 The one-carbon recursive ketoacid elongation pathway is responsible for making various  
15 branched-chain amino acids, aldehydes, alcohols, and acetate esters in living cells. Controlling  
16 selective microbial biosynthesis of these target molecules at high efficiency is challenging due to  
17 enzyme promiscuity, regulation, and metabolic burden. In this study, we present a systematic  
18 modular design approach to control proteome reallocation for selective microbial biosynthesis of  
19 branched-chain acetate esters. Through pathway modularization, we partitioned the branched-  
20 chain ester pathways into four submodules including keto-isovalerate submodule for converting  
21 pyruvate to keto-isovalerate, ketoacid elongation submodule for producing longer carbon-chain  
22 keto-acids, ketoacid decarboxylase submodule for converting ketoacids to alcohols, and alcohol  
23 acyltransferase submodule for producing branched-chain acetate esters by condensing alcohols  
24 and acetyl-CoA. By systematic manipulation of pathway gene replication and transcription,  
25 enzyme specificity of the first committed steps of these submodules, and downstream competing  
26 pathways, we demonstrated selective microbial production of isoamyl acetate over isobutyl  
27 acetate. We found that the optimized isoamyl acetate pathway globally redistributed the amino  
28 acid fractions in the proteomes and required up to 23-31% proteome reallocation at the expense of  
29 other cellular resources, such as those required to generate precursor metabolites and energy for  
30 growth and amino acid biosynthesis. The engineered strains produced isoamyl acetate at a titer of  
31 8.8 g/L (> 0.25 g/L toxicity limit), a yield of 0.17 g/g (47% of maximal theoretical value), and  
32 86% selectivity, achieving the highest titers, yields and selectivity of isoamyl acetate reported to  
33 date.

34

35 **Keywords:** modular design, ester biosynthesis, pathway selectivity, isobutyl acetate, isoamyl  
36 acetate, proteomics, proteome reallocation, metabolic burden, *Escherichia coli*.

## 37 INTRODUCTION

38 Short-chain esters formulate volatile compounds commonly found in flowers, ripe fruits, and  
39 fermenting yeasts (Sugimoto et al., 2021; Sumbly et al., 2010). Some of these esters are suggested  
40 to have an important ecological role in pollination (Knudsen and Tollsten, 1993). Industrially,  
41 these esters have versatile utility as flavors, fragrances, solvents, and biofuels. For instance,  
42 isoamyl acetate (3-methyl-1-butyl acetate) is known as banana oil with a global market value of  
43 \$5 billion in 2019 (IndustryARC, 2019; IndustryResearch, 2021). An isomer of isoamyl acetate,  
44 ethyl valerate, is fully compatible for blending with gasoline or diesel (Lange et al., 2010),  
45 suggesting potential application of isoamyl acetate as drop-in biofuel. Currently, knowledge about  
46 the microbial biosynthesis of these molecules from renewable and sustainable feedstocks is  
47 limited, making it difficult to optimize their production without further interrogation.

48 Biologically, cells can synthesize an ester by condensing an alcohol and an acyl-CoA with  
49 an alcohol acyltransferase (AAT) (Mason and Dufour, 2000). Due to the abundance and  
50 essentiality of acetyl-CoA in living cells, acetate esters are the most common esters found in  
51 nature. By activating one-, two-, or three-carbon recursive elongation via the recursive fatty acid  
52 biosynthesis (Liu et al., 2016; Youngquist et al., 2013), reverse beta-oxidation (Dellomonaco et  
53 al., 2011), or Ehrlich pathways (Atsumi et al., 2008; Zhang et al., 2008), it is possible to synthesize  
54 a large library of acetate esters containing unique alcohol moieties with linear, branched, even,  
55 and/or odd carbon chains (Layton and Trinh, 2016a; Layton and Trinh, 2016b; Lee and Trinh,  
56 2020). However, selective microbial biosynthesis of designer acetate esters at high efficiency has  
57 been an outstanding metabolic engineering problem. For instance, branched-chain acetate esters  
58 (e.g., isoamyl acetate) represent an important class of molecules that can be synthesized via the  
59 one-carbon recursive ketoacid elongation pathway (Connor et al., 2010; Connor and Liao, 2008).

60 Starting from the precursor pyruvate, this pathway generates ketoacids that can be decarboxylated  
61 to aldehydes, reduced to branched-chain alcohols, and condensed to acetate esters. Isobutyl acetate  
62 is generated in the first cycle, followed by isoamyl acetate in the second cycle, and so on. Although  
63 microbial production of isoamyl acetate has been reported since early 2000s by the condensation  
64 of isoamyl alcohol and acetyl CoA, production titers ( $<1$  g/L) and selectivities ( $< 30\%$ ) were  
65 relatively low (Abe and Horikoshi, 2005; Horton et al., 2003; Vadali et al., 2004a; Vadali et al.,  
66 2004b).

67 Many confounding factors might negatively affect selective microbial biosynthesis of  
68 branched-chain acetate esters. In addition to the well-known toxicity of higher alcohols and esters  
69 (Wilbanks and Trinh, 2017b) and required expression of multiple pathway enzymes (Tai et al.,  
70 2015), the recursive one-carbon elongation pathway generates intermediate alcohol byproducts  
71 (e.g., isobutanol) that compete with the target biosynthesis of esters (e.g., isobutyl acetate instead  
72 of isoamyl acetate) (Dellomonaco et al., 2011; Layton and Trinh, 2014; Marcheschi et al., 2012;  
73 Martin et al., 2003; Zhang et al., 2008). Currently, understanding and controlling this recursive  
74 elongation pathway for efficient biosynthesis of target branched-chain acetate esters remains  
75 elusive. A cellular proteome constitutes  $\sim 50\%$  of dry cell weight, requiring a significant resource  
76 investment (Neidhardt et al., 1990). As rewiring cellular metabolism can severely impact overall  
77 proteome allocation, especially when multiple enzyme pathways are introduced and/or  
78 overexpressed, proteome allocation or reallocation must be considered to achieve optimal product  
79 production. This reallocation, however, is complex and poorly understood because it requires a  
80 precise control of the expression, specificities, and activities of multiple pathway enzymes in order  
81 to achieve optimal metabolic fluxes for selective microbial production of the target molecule  
82 (Lechner et al., 2016) and avoid metabolic burden (Wu et al., 2016).

83           In this study, we presented a systematic modular design approach to control proteome  
84 reallocation for the selective microbial biosynthesis of branched-chain acetate esters via  
85 manipulation of substrate specificity and expression level of multiple pathway enzymes. For proof-  
86 of-concept, we demonstrated the approach to enable selective production of isoamyl acetate over  
87 isobutyl acetate by controlling the one-carbon recursive ketoacid elongation pathway. Using  
88 quantitative proteomics, we shed light on pathway-level proteome reallocation, metabolic burden,  
89 and bottlenecks, which guided the effective metabolic rewiring for the efficient target ester  
90 biosynthesis.

91

## 92 **RESULTS**

### 93 **Design, construction, and characterization of a generalizable modular, non-linear,** 94 **branched-chain acetate ester pathway**

95           *Modular pathway design principles.* The branched-chain acetate ester biosynthesis  
96 pathway is derived from pyruvate (Fig. 1a). Pyruvate is converted to 2-ketoisovalerate via the L-  
97 valine biosynthesis pathway (KIV submodule) then elongated to 2-ketoacids via the +1 recursive  
98 ketoacid elongation cycle mediated by the LeuABCD operon (keto-acid elongation submodule).  
99 The Ehrlich pathway (KDC submodule) converts 2-ketoacids to aldehydes and alcohols, then the  
100 alcohol acyltransferase pathway (AAT submodule) condenses alcohols and acetyl-CoA to form  
101 branched-chain acetate esters. The key enzymes governing each pathway submodule such as  
102 acetolactate synthase (IlvB or AlsS) (Steinmetz et al., 2010), 2-isopropylmalate synthase (LeuA)  
103 (Ulm et al., 1972; Wiegel and Schlegel, 1977), ketoacid decarboxylase (KDC) (de la Plaza et al.,  
104 2004; Mak et al., 2015), and alcohol acyltransferase (AAT) (Cumplido-Laso et al., 2012; Nancolas  
105 et al., 2017) are promiscuous, formulating a generalizable non-linear, branched-chain acetate ester

106 biosynthesis pathway derived from the interconnected submodules (Fig. 1b). Due to the enzyme  
107 promiscuity and pathway modularity, we hypothesized that balancing proteome of the individual  
108 submodules with manipulated key enzymes (i.e., AlsS, LeuA, Kdc, and AAT) is critical to control  
109 selectivity of designer acetate ester production with high titers and yields. As a proof of concept,  
110 we demonstrated the feasibility of controlling selective production of isoamyl acetate over isobutyl  
111 acetate as a byproduct.

112 ***Construction and characterization of KIV and KDC submodules.*** We first aimed to  
113 construct a strong KIV submodule to produce 2-ketoisovalerate (KIV), the key precursor  
114 metabolite of the branched-chain acetate ester pathway. Because metabolic balance between the  
115 KIV and KDC submodules is also important for high production of branched-chain alcohols, we  
116 started by optimizing the expression of these two submodules simultaneously that can be evaluated  
117 by measuring isobutanol production. Since heterologous expression of acetolactate synthase  
118 (AlsS) from *Bacillus subtilis* and 2-ketoisovalerate decarboxylase (KivD) from *Lactococcus lactis*  
119 is critical for high-level isobutanol production (Atsumi et al., 2008), we constructed three different  
120 plasmids (i.e., pACYC, pCDF, and pRSF) harboring *alsS* and *kivD* with different plasmid copy  
121 numbers (PCNs) to rapidly optimize the production submodules. Then, we introduced them to a  
122 BL21 (DE3) strain harboring an operon of *ilvC*, *ilvD*, and *yqhD* under the control of T7 promoter  
123 in a medium copy number pET23a plasmid (Fig. 1c). Isobutanol production by the recombinant  
124 *E. coli* strains were measured to identify the most efficient combination of the production  
125 submodules. The result showed that HSEC0503 harboring *alsS* and *kivD* in a high copy number  
126 plasmid (pRSFDuet-1) produced the highest level of isobutanol (6.4 g/L) within 48 hours (h),  
127 while HSEC0501 carrying *alsS* and *kivD* in a low copy number plasmid (pACYCDuet-1) produced  
128 only 0.03 g/L of isobutanol (Fig. 1c). This result suggested that the high-level expression of *alsS*

129 and *kivD* to increase enzyme levels is important to pull the metabolic flux towards the branched-  
130 chain acetate ester pathway.

131 *Assembly and characterization of the de novo isoamyl acetate pathway module.*

132 Combining the elongation and AAT submodules together with the KIV and KDC submodules  
133 forms the isoamyl acetate pathway (Figs. 1a, 1b, 1d). To construct the elongation submodule, a  
134 *leuABCD* operon was cloned in a medium copy number pCDFDuet-1 plasmid (Fig. 1d). While  
135 overexpressing the elongation submodule pulls metabolic flux towards isoamyl acetate, it should  
136 be noted that isobutyl acetate can still be produced as a byproduct due to the promiscuity of the  
137 KDC submodule that can produce either isobutanol or isoamyl alcohol (de la Plaza et al., 2004).  
138 To enhance selective production of isoamyl acetate in our design, we reasoned that high substrate  
139 specificity towards isoamyl alcohol should be chosen to create the AAT submodule. Recently, a  
140 chloramphenicol acetyltransferase (CAT) was engineered and repurposed as an AAT to produce a  
141 broad range of esters, capable of converting isoamyl alcohol to isoamyl acetate with 95%  
142 (mol/mol) efficiency in *E. coli* (Seo et al., 2021). Specifically, the engineered CATec3 Y20F  
143 derived from *E. coli* exhibited 3.5-folds higher catalytic efficiency ( $k_{cat}/K_M$ ) towards isoamyl  
144 alcohol than isobutanol (Seo et al., 2021), showing a higher selectivity against isoamyl alcohol  
145 than isobutanol as compared to other available AATs (Tai et al., 2015) (Fig. S1). Therefore, we  
146 deployed CATec3 Y20F to build the AAT submodule for selective production of isoamyl acetate  
147 (Fig. 1d).

148 By introducing the KIV, elongation, KDC, and AAT submodules into *E. coli* BL21(DE3),  
149 we created the strain HSEC1006 capable of performing the *de novo* biosynthesis of isoamyl acetate  
150 from fermentable sugars. The characterization results showed that HSEC1006 produced 0.08 g/L  
151 ethyl acetate, 0.32 g/L isobutyl acetate and 0.29 g/L isoamyl acetate from glucose with 44.3%  
152 selectivity (Fig. 1d). While the *de novo* isoamyl acetate biosynthesis was successfully

153 demonstrated, the titer and selectivity were still low and hence required further pathway  
154 optimization.

155

### 156 **Enhancing selective production of isoamyl acetate module**

157 To boost isoamyl acetate production with higher selectivity, we applied three push-and-pull  
158 metabolic engineering strategies: deletion of competing pyruvate and acetyl-CoA pool related  
159 genes (i.e., *adhE* encoding aldehyde-alcohol dehydrogenase used for ethanol synthesis and *dld*  
160 encoding quinone-dependent D-lactate dehydrogenase used for lactate synthesis), overexpression  
161 of a feedback insensitive LeuA G462D mutant (Mikhail Markovich Gussyatiner, 1999), and  
162 overexpression of a longer chain keto-acid specific KivD F381L/V461A (Zhang et al., 2008). We  
163 constructed four strains by implementing combinations of these strategies and measured acetate  
164 ester production (Fig. 2a). Deletion of *adhE* and *dld* in the strain HSEC1207 improved isoamyl  
165 acetate by 1.9-fold (0.5 g/L) as compared to HSEC1006, while isobutyl acetate titer was not  
166 significantly changed regardless of the increased isobutanol (Fig. 2c), suggesting that CATec3  
167 Y20F was effective for selective isoamyl acetate production. A combination of KivD  
168 F381L/V461A overexpression and *adhE* and *dld* deletion in the strain HSEC1208 further  
169 improved isoamyl acetate titer up to 0.8 g/L, while isobutyl acetate production decreased to 0.2  
170 g/L (Fig. 2a). Interestingly, HSEC1209 expressing feedback insensitive LeuA (G462D) and wild-  
171 type KivD produced the similar titers of isoamyl acetate as compared to HSEC1208, while only  
172 0.06 g/L of isobutyl acetate was produced (Fig. 2a). The results indicate that both Kdc and LeuA  
173 enzymatic steps are critical for selective branched-chain acetate ester production.

174 HSEC1210 expressing both KivD F381L/V461A and LeuA G462D did not improve  
175 isoamyl acetate production (Fig. 2a). Like HSEC1209, HSEC1210 significantly reduced the  
176 byproduct isobutyl acetate from 0.2 g/L to 0.07 g/L. Due to the reduced production of isobutyl



177 acetate, selectivity of isoamyl acetate in the strain HSEC1210 increased 2.1-fold (91.3%), as  
178 compared to HSEC1006 (44.3%) (Fig. 2b). We observed that more than 92% (w/w) of isobutyl  
179 acetate and isoamyl acetate were extracted to the hexadecane layer, consistent with a previously  
180 reported extraction efficiency (Rodriguez et al., 2014). However, isobutanol and isoamyl alcohol  
181 were accumulated at a high level in HSEC1210, up to 1.5 g/L and 2.5 g/L in the culture medium,  
182 respectively (Figs. 2c, 2d). Because isoamyl alcohol at 2.5-3.0 g/L concentration inhibits 50-80%  
183 of cell viability (Connor and Liao, 2008; Wilbanks and Trinh, 2017a), the accumulated alcohols  
184 might have likely caused the 30% lower cell mass of HSEC1210 than the other strains (Fig. 2e).

185 Taken together, manipulating the key metabolic enzymes AlsS, Kivd, and LeuA can  
186 effectively control selective production of isoamyl acetate over isobutyl acetate. However,  
187 metabolic bottleneck(s) in the engineered pathway module is still present in HSEC1210, likely  
188 limiting its isoamyl acetate production.

189

## 190 **Proteomic analysis reveals proteome reallocation by isoamyl acetate pathway overexpression**

### 191 *Identification of metabolic bottlenecks due to imbalanced pathway protein allocation.*

192 Higher accumulation of alcohols in HSEC1210 implies that the metabolic flux of isoamyl acetate  
193 module was not well balanced. We hypothesized that this imbalance might have been caused by a  
194 metabolic burden imparted by the necessary overexpression of multiple heterologous and  
195 endogenous genes in the isoamyl acetate pathway. To understand this imbalance and identify the  
196 potential metabolic bottlenecks that might have limited isoamyl acetate production, we examined  
197 proteome reallocation of HSEC1210 growing under conditions with and without IPTG induction  
198 of the target pathway. As expected, the uninduced HSEC1210 ( $1.09 \pm 0.03$  1/h) grew faster than  
199 IPTG-induced HSEC1210 ( $0.63 \pm 0.01$  1/h) (Fig. 3a). Without the IPTG induction, HSEC1210  
200 did not produce any detectable amount of isoamyl alcohol and isoamyl acetate likely due to the

201 tight regulation of the isoamyl acetate pathway genes under the T7 and T7lac promoters. With  
202 IPTG induction, the isoamyl acetate biosynthetic proteins were significantly more abundant than  
203 the control, confirming all ten genes were successfully overexpressed (Figs. 3b, 3c). Especially,  
204 the three proteins AlsS, KivD\*, and LeuA\* represented an outsized share of protein expression  
205 relative to the whole proteome, exhibiting the highest levels of protein abundances in the pathway  
206 and were ranked at 1, 11, and 19 in increased abundances in the proteome, achieving 602-, 60-,  
207 and 47-fold more abundant than the control (without IPTG), respectively. These proteins represent  
208 three important metabolic steps to direct metabolic fluxes towards the high production of isoamyl  
209 acetate.

210 ***Overexpression of the isoamyl acetate module resulted in significant proteome***  
211 ***reallocation.*** Upon IPTG induction, the mass fraction of the isoamyl acetate pathway proteome  
212 increased about 8-fold, representing 3.9% of total protein abundance in the uninduced control and  
213 31.9% upon induction. This increase in protein abundances is seemingly at the expense of other  
214 cellular systems, pathways, and resources such as those invested for generation of precursor  
215 metabolites and energy (i.e., glycolysis, TCA cycle, mixed acid fermentation, acetyl CoA  
216 biosynthesis, respiration, pentose-P-phosphate, ATP biosynthesis, and glyoxylate pathway) and  
217 amino acid biosynthesis (Fig. 3d). For instance, by examining the glycolysis, we observed that the  
218 abundances of many glycolysis-related proteins, such as glucose-6-phosphate isomerase (Pgi), 6-  
219 phosphofruktokinase (Pfk), fructose-and bisphosphate aldolases (Fba), were significantly reduced  
220 upon the isoamyl acetate pathway overexpression (Fig. 3f). The decreased abundances of the  
221 pyruvate dehydrogenase enzyme complex (i.e., AceE, Lpd, and AceF) of the acetyl-CoA  
222 biosynthesis pathway correlated well with the increased flux towards the isoamyl acetate pathway.  
223 Since 0.1mM IPTG concentration has little inhibitory effect on *E. coli* growth (Kosinski et al.,  
224 1992) and isoamyl alcohol accumulation (0.13 g/L) was relatively low during the exponential

225 growth phase, the reduced growth was likely attributed to the metabolic burden caused by  
226 simultaneous overexpression of multiple enzymes.

227 By examining the isoamyl acetate pathway proteins, we could further identify an  
228 imbalanced overexpression among the target genes. Even though the target pathway genes that  
229 were expressed on higher copy plasmids yielded more abundant proteins as expected, the genes  
230 belonging to the same operons exhibited different levels of protein abundances. For instance, AlsS  
231 was much more abundant than CATec3 Y20F in the *alsS-cat* operon, IlvC more abundant than  
232 YqhD in the *ilvC-ilvD-yqhD* operon, and LeuA\* more abundant than LeuB, LeuC, and LeuD in  
233 the *leuABCD* operon (Figs. 2d, 3c).

234 Globally, we observed a large perturbation in the amino acid reallocation constituting the  
235 proteome. The mass fraction contributions of cysteine (+27%), methionine (+10%), serine (+7%),  
236 glycine (+5%), aspartate (+3.2%) and alanine (+2.3%) in the proteome increased at least 2% while  
237 those of tryptophan (-13%), valine (-5.2%), threonine (-3.8%), glutamate (-3.8%), proline (-3.5%),  
238 tyrosine (-2.5%), phenylalanine (-2.5%), arginine (-2.2%), and histidine (-2.1%) decreased at least  
239 2% (Fig. 3e). This analysis was based on the aggregate abundance for isoamyl acetate pathway  
240 proteins and their amino acid distributions relative to those observed in the quantifiable proteome.  
241 Since the isoamyl acetate pathway proteins represent an outsized share of protein abundance upon  
242 induction, the resource demand of the pathway module could impart a sizable burden on the rest  
243 of the system (i.e., amino acid biosynthesis, transcription and translation machinery, energetics,  
244 etc.)

245 Taken together, overexpression of the isoamyl acetate pathway and its effect on proteome  
246 allocation suggest an imposed metabolic burden. The severe fold-change abundance difference of  
247 CATec3 Y20F upon induction, as compared to AlsS, and high accumulation of isoamyl alcohol  
248 implied that CATec3 Y20F might be the rate limiting step.

249           ***Tuning the isoamyl acetate pathway by enhancing CATec3 Y20F expression.*** To test  
250 whether the AAT activity was the bottleneck for the isoamyl acetate production, we introduced an  
251 additional monocistronic CATec3 Y20F gene under the control of T7lac promoter on the medium  
252 copy pCDF plasmid (Fig. 4a). The additional expression of CATec3 Y20F in HSEC1311 did not  
253 affect cell growth as compared to HSEC1210 (Fig. 4b) but improved isoamyl acetate production  
254 by 4.3-fold, reaching a titer of 3.1 g/L (Fig. 4c). Isoamyl alcohol accumulation in HSEC1311 was  
255 significantly reduced by 10-fold from 2.93 g/L to 0.22 g/L (Fig. 4d). This perturbation reduced the  
256 enzyme aggregate abundance of the isoamyl acetate pathway from 31.9% to 22.6%, while the  
257 reallocation for generation of precursor metabolites and energy and amino acids were enhanced  
258 (Figs. 4g, S2). The CATec3 Y20F abundance was 10.2-folds higher in HSEC1311 than HSEC1210  
259 while other proteins of the isoamyl acetate pathway exhibited a 1.7- to 3-folds decrease in protein  
260 abundance (Fig. 4f), likely due to the transcriptional and/or translational competition by the  
261 introduction of an additional CATec3 Y20F operon. Remarkably, the additional expression of  
262 CATec3 Y20F resulted in the amino acid reallocation in the global proteome (Fig. 4e). Mass  
263 fractions of some amino acids in the proteome became more abundant in HSEC1311 than  
264 HSEC1210 while others were reduced. The trend observed here is reciprocal to the scenario of  
265 HSEC1210 growing in the media with and without IPTG induction. The mass fraction  
266 contributions of tryptophan (+7.0%), tyrosine (+3.1%), and phenylalanine (+2.7%) in the proteome  
267 increased at least 2% while those of cystine (-6.7%), serine (-2.9%), and methionine (-2.5%)  
268 decreased at least 2 %.

269           Overall, CATec3 Y20F was the rate limiting step in HSEC1210. The additional  
270 overexpression of this protein in HSEC1311 helped alleviate both the metabolic bottleneck and  
271 metabolic burden.

272

## 273 **Demonstration of high-level isoamyl acetate production**

274 ***Further deletion of upstream competing pathways did not improve isoamyl acetate***  
275 ***production.*** We next examined whether additional deletion of competitive upstream pathways in  
276 HSEC1311 could further improve production of isoamyl acetate. Our deletion targets included  
277 *ldhA* (L-lactate dehydrogenase), *ackA-pta* (an operon of acetate kinase and phosphate  
278 acetyltransferase), *ilvE* (branched chain amino acid aminotransferase), and *tyrB* (aromatic amino-  
279 acid aminotransferase), which can potentially help reduce the lactate and acetate formation as  
280 byproducts and improve ketoacid availability (Fig. 5a). The isoamyl acetate production modules  
281 were plugged into the engineered strains and isoamyl acetate yields were compared (Figs. 5b, S3).  
282 Our results showed that deletion of the upstream pathway enzymes did not significantly improve  
283 isoamyl acetate yield, suggesting that the upstream competitive pathways were not major  
284 metabolic bottlenecks in our system. Isoamyl acetate yield reached up to 0.17 (g/g glucose) that  
285 corresponds to 47% of the maximum theoretical yield (0.36 g/g).

286 ***Fed-batch fermentation boosted high-level production of isoamyl acetate.*** The  
287 considerable isoamyl acetate yield prompted us to investigate whether glucose-fed batch  
288 fermentation with pH control could increase isoamyl acetate production. Because the *ilvE* and *tyrB*  
289 deletions can affect amino acid utilization (Iwasaki et al., 2021) during a prolonged isoamyl acetate  
290 production, we characterized and compared the isoamyl acetate production of the two engineered  
291 strains, including HSEC1513 (BL21 (DE3)  $\Delta adhE \Delta dld \Delta ldhA \Delta ackA-pta$  harboring the isoamyl  
292 acetate production modules) and HSEC1715 (BL21 (DE3)  $\Delta adhE \Delta dld \Delta ldhA \Delta ackA-pta \Delta ilvE$   
293  $\Delta tyrB$  harboring the isoamyl acetate production modules) over 144 h (Figs. 5c, 5d, 5e).  
294 Remarkably, we observed accumulation of isoamyl alcohol from both strains for the first 24 h and  
295 optical density (OD<sub>600nm</sub>) decreased from 3.2 to 1.4 between 12 to 36 h, probably due to alcohol  
296 toxicity (Fig. 5c). The OD<sub>600nm</sub> later increased up to 4.3, and the accumulated isoamyl alcohol was

297 converted to isoamyl acetate for the next 72 h. HSEC1513 and HSEC1715 produced isoamyl  
298 acetate up to 8.4 g/L (82% selectivity) and 8.8 g/L (86% selectivity), respectively, reporting the  
299 highest microbial production of isoamyl acetate titers up to date (Figs. 5d, 5e). The byproduct  
300 isobutyl acetate was produced up to 1.4 g/L. Since HSEC1513 and HSEC1715 showed little  
301 difference in cell growth and isoamyl acetate production, we concluded that the aminotransferases  
302 were not the major bottlenecks in our engineered strains.

303

## 304 **DISCUSSION**

305 The one-carbon recursive elongation pathway is important for making branched-chain amino  
306 acids, aldehydes, alcohols, and esters. Due to this complex and highly branched pathway,  
307 controlling selective microbial biosynthesis of these target molecules has been an outstanding  
308 metabolic engineering problem. To address the problem, we developed a generalizable modular  
309 design framework to systematically tune selective microbial biosynthesis of branched-chain  
310 acetate esters that require the integration of four submodules including the KIV submodule, the  
311 elongation submodule, the KDC submodule, and the AAT submodule. We validated this  
312 framework by demonstrating selective biosynthesis of isoamyl acetate over isobutyl acetate as an  
313 ester byproduct, achieving the highest titer (8.7 g/L), yield (0.17 g/g), and selectivity (86%)  
314 reported to date.

315 Critical to selective microbial biosynthesis of branched-chain acetate esters is control of  
316 protein expression and specificity of the first committed steps of the four submodules including  
317 AlsS, LeuA\*, Kivd\*, and CAT\*. To achieve high production of isoamyl acetate, the engineered  
318 pathway required overexpression of 10 genes, which made up about 23-31% of total proteome  
319 allocation and represented a relatively large fractional share of overall proteome abundance as

320 compared to the non-overexpressed control. This metabolic pathway rewiring caused global  
321 perturbations that can be seen in the fraction of amino acids within the proteome. This metabolic  
322 tradeoff occurred at the expense of other cellular processes such as the fueling pathways  
323 responsible for generating precursor metabolites, and energy and amino acid biosynthesis, which  
324 could explain the observed metabolic burden affecting cell growth and yield. While the push-and-  
325 pull strategy of metabolic fluxes towards the target pathway(s) is commonly practiced in metabolic  
326 engineering, our study provides direct quantitative evidence of the proteome reallocation required  
327 to achieve pathway efficiency and potential metabolic tradeoffs.

328 Remarkably, close examination of the engineered pathway proteins shows that increase in  
329 abundances of target proteins might be significantly different even though their encoding genes  
330 are organized in the same operon. Upstream genes exhibited larger relative increases in protein  
331 abundance relative to downstream ones within an operon. Different amino acid requirements,  
332 codon usage, and/or protein folding efficiency for each protein might have contributed to this  
333 discrepancy. Our result further revealed that a single limiting enzymatic step, such as AAT, could  
334 impose a detrimental metabolic bottleneck/burden due to flux imbalance and hence accumulation  
335 of alcohol intermediates that become inhibitory.

336 Medium chain length ( $C_6$ - $C_{10}$ ) branched esters are relatively hydrophobic metabolites and  
337 therefore, toxic to cells as they interfere with cell membranes (Wilbanks and Trinh, 2017a). Due  
338 to low solubility of these esters in aqueous solutions, our study demonstrated the feasibility of  
339 producing them at much higher concentrations than their reported toxicity limit (0.25 g/L) via *in*  
340 *situ* fermentation and extraction. Our data also demonstrate that ester biosynthesis could help  
341 detoxify alcohols as intermediates via overexpression of AAT whereby the resulting esters are  
342 immediately extracted by a non-toxic solvent overlay such as hexadecane. Even though the  
343 enhanced expression level of CATs improved isoamyl acetate production, accumulation of

344 isoamyl alcohol and decrease in cell growth observed during the fed-batch fermentation suggested  
345 that the AAT activity was still a major bottleneck (Fig. 5c).

346 Unlike other eukaryotic AATs, use of CATec3 Y20F is beneficial for designer ester  
347 production due to higher solubility, thermostability, and selectivity (Seo et al., 2021). However,  
348 it has relatively lower catalytic efficiency towards short chain alcohols such as isobutanol and  
349 isoamyl alcohol. Thus, future protein engineering of CATec3 Y20F for improved catalytic  
350 efficiency towards isoamyl alcohol can help reduce the alcohol accumulation while not requiring  
351 high protein expression. Although our study focused on the selective microbial biosynthesis of  
352 isoamyl acetate as a proof-of-concept, the generalizable modular design of the recursive one-  
353 carbon elongation pathway can be extended to produce longer branched-chain acetate esters such  
354 as isohexyl acetate and isoheptyl acetate. Since CATec3 Y20F has higher catalytic efficiency  
355 towards longer chain alcohols (Seo et al., 2021), it is expected that the selectivity of KDC and/or  
356 LeuA needs to be further engineered to achieve selective microbial biosynthesis of designer acetate  
357 esters with longer carbon chain lengths.

358 One potential challenge of branched chain acetate ester biosynthesis is the stoichiometric  
359 redox imbalance that might cause growth inhibition and/or impaired production. Fermentative  
360 isoamyl acetate production requires two moles of glucose to produce two acetyl-CoAs and one  
361 isoamyl alcohol ( $2 \text{ Glucose} + 5 \text{ NAD(P)}^+ = 1 \text{ Isoamyl acetate} + 5 \text{ CO}_2 + 5 \text{ NAD(P)H}$ ). Therefore,  
362 the pathway generates five moles of excess NAD(P)H that could inhibit the fermentation under an  
363 oxygen limited condition without an appropriately coupled electron sink(s). Indeed, HSEC1311  
364 was not able to grow without oxygen (Fig. S4), suggesting the possible inhibition of fermentation  
365 by the cofactor imbalance under the oxygen limited conditions. Recent studies suggest that  
366 modular cell design principle can harness such electron redundancy for multi-objective strain  
367 design by coupling production pathways with cell growth (Garcia and Trinh, 2019; Wilbanks et



368 al., 2018). Therefore, further optimization should include process engineering and chassis cell  
369 design for improved production of branched-chain acetate esters.

370

## 371 **MATERIALS AND METHODS**

372 **Strains and plasmids.** *E. coli* DH5 $\alpha$  and BL21(DE3) were used for molecular cloning and ester  
373 production, respectively. The strains and plasmids used are listed in Table 1.

374

375 **Media and cultivation.** *E. coli* strains were grown in lysogeny broth (LB) medium or M9 hybrid  
376 medium containing glucose as a carbon source and 5 g/L yeast extract supplemented with 100  
377  $\mu\text{g}/\text{mL}$  ampicillin and/or 100  $\mu\text{g}/\text{mL}$  spectinomycin and/or 50  $\mu\text{g}/\text{mL}$  kanamycin when  
378 appropriate.

379 For the batch fermentation, cells were cultured microaerobically in a 125 mL screw-capped  
380 shake flask with a working volume of 20 mL in M9 medium containing 30 g/L glucose and 5 g/L  
381 yeast extract. 10 mL of hexadecane (50% v/v) was overlaid to extract esters produced during the  
382 fermentation. To compare performance of the engineered strains, cells were cultured at 37°C for  
383 48 h and the culture supernatant and hexadecane layer were analyzed. For the fed-batch  
384 fermentation, 20g/L glucose working concentration was intermittently added to the culture using  
385 600 g/L glucose stock when the glucose concentration was below 5 g/L. The pH was adjusted with  
386 5M KOH to maintain its value between 6.0 and 7.5 every 12 h after 24 h until 120 h.

387

388 **Molecular cloning**

389           **Plasmid construction.** Plasmids were constructed by ligation-dependent cloning and/or  
390 Gibson DNA assembly. Briefly, DNA fragments were amplified using the Phusion DNA  
391 polymerase (cat# F530S, Thermo Fisher Scientific, MA, USA) and then purified by DNA  
392 purification and gel extraction kits (Omega BioTek, GA, USA). For the ligation-dependent  
393 cloning, the vectors and inserts were digested by restriction enzymes and ligated together using a  
394 T4 DNA ligase. In the case of Gibson DNA assembly cloning, the purified DNA fragments of the  
395 vector and insert were mixed together with the Gibson master mix (Gibson et al., 2009) and  
396 assembled at 50°C for 1 h. Using the DNA mixtures, *E. coli* DH5 $\alpha$  was transformed by heat-shock  
397 transformation and selected on LB agar plates (15 g/L agar) with appropriate antibiotics. All the  
398 constructed plasmids were checked by PCR amplification and/or restriction enzyme digestion,  
399 and/or Sanger sequencing. The primers used in this study are listed in Table S1.

400           **Recombineering.** *E. coli* gene deletions were carried out using recombineering (Sharan et  
401 al., 2009). A temperature sensitive low-copy plasmid that contains *exo*, *bet*, and *gam* in their native  
402 phage operon, pL, under  $\lambda$  CI repressor control (pSIM6) was used to induce homologous  
403 recombination of double strand DNA into the genome (Datta et al., 2006). Briefly, *E. coli* strains  
404 harboring pSIM6 was cultured in 3 mL LB medium at 30°C overnight. The grown cells were  
405 transferred to fresh 20 mL LB medium in a 250 mL flask with 1% inoculum size (200  $\mu$ L) and  
406 cultured for 2-3 hours in a water bath shaking incubator at 200 rpm and 32°C. At OD<sub>600nm</sub> of  
407 0.4~0.6, the cell culture flask was transferred to a preheated 42°C water bath shaking incubator at  
408 200 rpm for 15 minutes (min). Then, the cells were immediately cooled down in ice for 10 mins  
409 and centrifuged at 4,700 rpm for 10 min. The cell pellets were washed twice with 50 mL ice-cool  
410 sterile Millipore water and then suspended in the 200  $\mu$ L ice-cool sterile Millipore water. 80 mL  
411 of the concentrated cells were mixed with ~100 ng of linear double-stranded DNA containing

412 FRT-Kan-FRT cassette, amplified by PCR. Then, the cells were transferred to an ice-chilled 1-  
413 mm gap electroporation cuvette (BTX Harvard Apparatus, MA, USA) followed by an exponential  
414 decay pulse with 1.8 kV, 350  $\Omega$ , and 25  $\mu$ F, which gave usual pulse duration of 4.5-6.0 ms. The  
415 cells were immediately mixed with 700 mL LB medium and recovered in a shaking incubator at  
416 30°C for 2 h. The recovered cells were plated on LB solid medium with 25 mg/mL kanamycin and  
417 incubated at 30°C for 2 days. Successful gene deletion was confirmed by colony PCR using  
418 multiple combinations of primers specifically binding at upstream and/or downstream of the target  
419 location and/or Kan in the FRT-Kan-FRT cassette (Table S1). The kanamycin resistance marker  
420 was subsequently disrupted by FLP mediated recombination of FRT by pCP20 (Datsenko and  
421 Wanner, 2000).

422

## 423 **Analytical methods**

424 ***Cell growth measurement.*** Cell growth was measured by optical density (OD) with a  
425 spectrophotometer (Spectronic 200+, Thermo Fisher Scientific, MA, USA) and/or a microplate  
426 reader (Synergy HTX microplate reader, BioTek) at 600 nm wavelength.

427 ***3,5-dinitrosalicylic acid (DNS) assay.*** Slightly modified DNS method was used to quickly  
428 quantify and monitor the glucose consumption during the glucose fed-batch culture (Miller, 1959).  
429 Briefly, 10  $\mu$ L of 1-, 2-, and 4-times diluted culture supernatants were mixed with 200  $\mu$ L of the  
430 DNS reagent consisting of 16 g/L NaOH, 5 g/L phenol, 5 g/L sodium sulfite, and 300 g/L  
431 potassium sodium tartrate, and 10 g/L DNS, and incubated at 98°C for 10 mins. The samples were  
432 read by a microplate reader at 540nm. The M9 medium with 0 g/L, 1 g/L, 3 g/L, 5 g/L, and 10 g/L  
433 glucose concentration was used as standard for every reaction.

434 ***Proteomics.*** Engineered *E. coli* strains (HSEC1210 uninduced; HSEC1210 induced with  
435 IPTG; HSEC1311 induced with IPTG) were cultured as described above and harvested at 24 h in

436 biological triplicates. Cells were pelleted, supernatants removed, and pellets snap frozen and stored  
437 at -80°C. Frozen pellets (~100 µL pellet volume) were then processed for LC-MS/MS-based  
438 proteomic measurements by resuspending in cold 100 mM Tris-HCl buffer, pH 8.0, adding ~200  
439 µL of 0.15 zirconium oxide beads, and bead beating with a Geno/Grinder 2010 (SPEX  
440 SamplePrep) for 5 min at high speed (1,750 rpm). Crude cell protein lysates were then further  
441 processed and proteolytically digested with trypsin as previously described (Walker et al., 2021).

442 Peptide samples were analyzed by automated 1D LC-MS/MS analysis using a Vanquish  
443 UHPLC plumbed directly to a Q Exactive Plus mass spectrometer (Thermo Scientific) outfitted  
444 with a trapping column coupled to an in-house pulled nanospray emitter (Walker et al., 2021). For  
445 each sample, 3 µg of peptides were loaded, desalted, and separated by uHPLC with the following  
446 conditions: sample injection followed by 100% solvent A (95% H<sub>2</sub>O, 5% acetonitrile, 0.1% formic  
447 acid ) chase from 0-30 min (load and desalt), linear gradient 0% to 30% solvent B (70%  
448 acetonitrile, 30% water, 0.1% formic acid) from 30-220 min (separation), and column re-  
449 equilibration at 100% solvent A from 220-240 min. Eluting peptides were measured and sequenced  
450 by data-dependent acquisition on the Q Exactive MS as previously described (Clarkson et al.,  
451 2017).

452 ***High-performance liquid chromatography (HPLC) analysis.*** Extracellular metabolites  
453 were quantified using HPLC system (Shimadzu Inc., MD, USA). 800 µL of culture samples were  
454 centrifuged at 17,000 xg for 3 m followed by filtering through a 96-well filter plate with 0.45  
455 micron. The samples were run with 10 mM sulfuric acid at 0.6 mL/min flow rate on an Aminex  
456 HPX-87H (Biorad Inc., CA, USA) column at 50°C. Concentrations of sugars, organic acids, and  
457 alcohols were determined by refractive index detector (RID) and ultra-violet detector (UVD).

458           **Gas chromatography coupled with mass spectroscopy (GC/MS) analysis.** Esters were  
459 quantified by GC (HP 6890, Agilent, CA, USA) equipped with a MS (HP 5973, Agilent, CA,  
460 USA). A Zebron ZB-5 (Phenomenex, CA, USA) capillary column (30 m x 0.25 mm x 0.25  $\mu$ m)  
461 was used with helium as the carrier gas at a flow rate of 0.5 mL/min. The oven temperature was  
462 programed as follows: 50°C initial temperature, 1°C/min ramp up to 58°C, 25°C/min ramp up to  
463 235°C, 50°C/min ramp up to 300°C, and 2-minutes bake-out at 300°C. 1  $\mu$ L sample was injected  
464 into the column with the 1:50 split mode at an injector temperature of 280°C. For the MS system,  
465 selected ion mode (SIM) was used to detect and quantify esters with the parameters described  
466 previously(Seo et al., 2021). As an internal standard, 10 mg/L n-decane were added in initial  
467 hexadecane layer and detected with m/z 85, 99, and 113 from 12 to 15 m retention time range.

468

#### 469 **Computational analysis**

470           **Proteomic analysis.** MS/MS spectra were searched against the *E. coli* BL21(DE3)  
471 proteome (UniProt; Aug21 build) appended with relevant exogenous protein sequences and  
472 common protein contaminants using the MS Amanda v.2.0 algorithm in Proteome Discoverer  
473 v.2.3 (Thermo Scientific). As described previously(Walker et al., 2021), peptide spectrum matches  
474 (PSM) were required to be fully tryptic with up to 2 miscleavages; a static modification of  
475 57.0214 Da on cysteine (carbamidomethylated) and a dynamic modification of 15.9949 Da on  
476 methionine (oxidized) residues. PSMs were scored and filtered using Percolator and false-  
477 discovery rates initially controlled at < 1% at both the PSM- and peptide-levels. Peptides were then  
478 quantified by chromatographic area-under-the-curve, mapped to their respective proteins, and  
479 areas summed to estimate protein-level abundance. Protein abundances were log<sub>2</sub> transformed,  
480 and sample abundance distributions normalized by LOESS then median centered in InfernoRDN

481 (Taverner et al., 2012). Missing values were imputed and sample groups statistically assessed in  
482 Perseus(Tyanova et al., 2016).

483 All raw mass spectra for quantification of proteins used in this study have been deposited  
484 in the MassIVE and ProteomeXchange data repositories under accession numbers  
485 MSV000088838 (MassIVE) and PXD031694 (ProteomeXchange), with data files available at  
486 <ftp://massive.ucsd.edu/MSV000088838/>.

487 ***Proteome reallocation analysis.*** EcoCyc version 25.5 was used to extract annotated genes,  
488 proteins, and pathways for proteome mapping of core metabolism using *E. coli* BL21(DE3) (Caspi  
489 et al.). These pathways include i) generation of metabolites and precursors (glycolysis, pentose  
490 phosphate pathway, Krebs cycle, glyoxylate cycle, respiration, fermentation, ATP biosynthesis,  
491 acetyl CoA biosynthesis, and Entner Doudoroff pathway), ii) amino acid biosynthesis, iii)  
492 aminoacyl-tRNA charging, and iv) isoamyl acetate biosynthesis. Amino acid sequences of each  
493 protein in the proteome were retrieved from UniProt (UniProt, 2021).

494 Mass fraction of protein  $P_i$ ,  $f_{P_i}$ , in the proteome is calculated as follows:

495 
$$f_{P_i} = \frac{PA_i}{\sum_{i=1}^N PA_i} [1]$$

496 where  $PA_i$  is the abundance of protein  $i$  in the proteome,  $N$  is the total number of proteins in the  
497 proteome measured, and  $\sum_{i=1}^N f_{P_i} = 1$ . For a metabolic pathway with  $M$  proteins, the mass fraction  
498 of pathway proteome,  $f_{Path}$ , is determined as follows:

499 
$$f_{Path} = \sum_{k=1}^M f_{P_i} [2]$$

500 Mass fraction of amino acid  $j$ ,  $f_{A_j}$ , in the proteome is calculated as follows:

501 
$$f_{A_j} = \frac{\sum_{i=1}^N AA_{ij} \cdot f_{P_i}}{\sum_{j=1}^{20} \sum_{i=1}^N AA_{ij} \cdot f_{P_i}} [3]$$

502 where  $AA_{ij}$  is the abundance of amino acid  $j$  in protein  $i$  of the proteome and  $\sum_{j=1}^{20} f_{A_j} = 1$ .

## 503 **ACKNOWLEDGMENTS**

504 This research was financially supported in part by the DOE BER award (DE-SC0022226) and the  
505 DOE subcontract grant (DE-AC05-000R22725) by the Center of Bioenergy Innovation, the U.S.  
506 Department of Energy Bioenergy Research Center funded by the Office of Biological and  
507 Environmental Research in the DOE Office of Science, and the U.S. Department of Energy Joint  
508 Genome Institute. The work conducted by the U.S. Department of Energy Joint Genome Institute,  
509 a DOE Office of Science User Facility, is supported under Contract No. DE-AC02-05CH11231.  
510 The authors would like to thank the Center of Environmental Biotechnology at UTK for using the  
511 GC/MS instrument.

512

## 513 **CREDIT AUTHOR STATEMENT**

514 **Hyeongmin Seo:** Conceptualization, Methodology, Validation, Formal analysis, Investigation,  
515 Data Curation, Writing- Original Draft, Visualization. **Richard J. Giannone:** Methodology,  
516 Validation, Formal analysis, Investigation, Data Curation, Writing- Review & Editing. **Yung-Hun**  
517 **Yang:** Resources, Writing- Review & Editing. **Cong T. Trinh:** Conceptualization, Methodology,  
518 Formal analysis, Investigation, Data Curation, Supervision, Project administration, Funding  
519 acquisition, Writing- Original Draft, Review & Editing.

520

## 521 **COMPETING INTERESTS**

522 The authors declare that they have no competing interests.

523

## 524 **SUPPLEMENTARY DATA**

525 **Supplementary File S1** contains Table S1 and Figures S1, S2, S3, S4.

526 **Table S1:** A list of primers used in this study.

527 **Figure S1.** Relative catalytic efficiency of AATs towards isoamyl alcohol over isobutanol.

528 **Figure S2.** Comparative proteomics of HSEC1311 and HSEC1210 growing in media with IPTG  
529 induction at 24h.

530 **Figure S3.** Isoamyl acetate titers of engineered strains with sequential gene deletions after 48 h  
531 culturing.

532 **Figure S4.** Growth of HSEC1311 under anaerobic and microaerobic conditions.

533

534



535 **Table 1:** A list of plasmids and strains used in this study.

| <b>Name</b>     | <b>Descriptions</b>                                                                                                                 | <b>Source</b>                      |
|-----------------|-------------------------------------------------------------------------------------------------------------------------------------|------------------------------------|
| <b>Plasmids</b> |                                                                                                                                     |                                    |
| pET29a          | pBR322 ori, Kan <sup>R</sup> , lacI, T7lac promoter                                                                                 | Novagen                            |
| pET_CATec3 Y20F | CATec3 Y20F encoding gene in pET29a, 6X His-tag at C-terminus                                                                       | This study                         |
| pACYCDuet-1     | p15A ori, Cm <sup>R</sup> , lacI, T7lac promoter                                                                                    | Novagen                            |
| pCDFDuet-1      | CloDF ori, Sm <sup>R</sup> , lacI, T7lac promoter                                                                                   | Novagen                            |
| pRSFDuet-1      | RSF ori, Kan <sup>R</sup> , lacI, T7lac promoter                                                                                    | Novagen                            |
| pET23a          | pBR322 ori, Amp <sup>R</sup> , T7 promoter                                                                                          | Novagen                            |
| pSIM6           | pSC101 repA <sup>ts</sup> , Gam, Beta, Exo under the control of a temperature sensitive promoter                                    | (Datta et al., 2006)               |
| pCP20           | repA101 <sup>ts</sup> , Cm <sup>R</sup> , Amp <sup>R</sup> , FLP recombinase under the control of a temperature sensitive promoter. | (Cherepanov and Wackernagel, 1995) |
| pHM46           | pCDFDuet-1:: <i>alsS::kivD</i>                                                                                                      | (Seo et al., 2016)                 |
| pHM47           | pET23a:: <i>ilvC, ilvD, yqhD</i>                                                                                                    | (Seo et al., 2016)                 |
| pHS121          | pRSFDuet-1:: <i>alsS::kivD</i>                                                                                                      | This study                         |
| pHS122          | pACYCDuet-1:: <i>alsS::kivD</i>                                                                                                     | This study                         |
| pHS133          | pRSFDuet-1:: <i>alsS, catec3 Y20F::kivD</i>                                                                                         | This study                         |
| pHS144          | pCDFDuet-1:: <i>LeuABCD</i>                                                                                                         | This study                         |
| pHS155          | pCDFDuet-1:: <i>LeuABCD::catec3 Y20F</i>                                                                                            | This study                         |
| <b>E. coli</b>  |                                                                                                                                     |                                    |
| DH5α            | Host for molecular cloning                                                                                                          | NEB                                |
| BL21(DE3)       | F <sup>-</sup> ompT gal dcm lon hsdSB(rB-mB-) λ(DE3 [lacI lacUV5-T7p07 ind1 sam7 nin5]) [malB+]K-12(λS)                             | Novagen                            |
| HSEC01          | BL21(DE3) harboring pET_CATec3 Y20F                                                                                                 | This study                         |
| HSEC0501        | BL21(DE3) harboring pHM47 and pHS122                                                                                                | This study                         |
| HSEC0502        | BL21(DE3) harboring pHM46 and pHS47                                                                                                 | This study                         |
| HSEC0503        | BL21(DE3) harboring pHM47 and pHS121                                                                                                | This study                         |
| HSEC0201        | BL21(DE3) Δ <i>adhE</i> , Δ <i>dld</i>                                                                                              | This study                         |
| HSEC0302        | BL21(DE3) Δ <i>adhE</i> , Δ <i>dld</i> , Δ <i>ldhA</i>                                                                              | This study                         |

|          |                                                                                                            |            |
|----------|------------------------------------------------------------------------------------------------------------|------------|
| HSEC0403 | BL21(DE3) $\Delta adhE$ , $\Delta dld$ , $\Delta ldhA$ , $\Delta ackA-pta$                                 | This study |
| HSEC0504 | BL21(DE3) $\Delta adhE$ , $\Delta dld$ , $\Delta ldhA$ , $\Delta ackA-pta$ , $\Delta ilvE$                 | This study |
| HSEC0605 | BL21(DE3) $\Delta adhE$ , $\Delta dld$ , $\Delta ldhA$ , $\Delta ackA-pta$ , $\Delta ilvE$ , $\Delta tyrB$ | This study |
| HSEC1006 | BL21(DE3) harboring pHM47, pHS133, and pHS144                                                              | This study |
| HSEC1207 | HSEC0201 harboring pHM47, pHS133, and pHS144                                                               | This study |
| HSEC1208 | HSEC0201 harboring pHM47, pHS133/kivD V461A, F381L, and pHS144                                             | This study |
| HSEC1209 | HSEC0201 harboring pHM47, pHS133, and pHS144/LeuA G462D                                                    | This study |
| HSEC1210 | HSEC0201 harboring pHM47, pHS133/kivD V461A, F381L, and pHS144/LeuA G462D                                  | This study |
| HSEC1311 | HSEC0201 harboring pHM47, pHS113/kivD V461A, F381L, and pHS155/LeuA G462D                                  | This study |
| HSEC1412 | HSEC0302 harboring pHM47, pHS113/kivD V461A, F381L, and pHS155/LeuA G462D                                  | This study |
| HSEC1513 | HSEC0403 harboring pHM47, pHS113/kivD V461A, F381L, and pHS155/LeuA G462D                                  | This study |
| HSEC1614 | HSEC0504 harboring pHM47, pHS133/kivD V461A, F381L, and pHS155/LeuA G462D                                  | This study |
| HSEC1715 | HSEC0605 harboring pHM47, pHS133/kivD V461A, F381L, and pHS155/LeuA G462D                                  | This study |

---

## 537 **FIGURE LEGENDS**

538

539 **Figure 1.** Modular design of branched-chain acetate ester production pathway. **(a)** A metabolic  
540 map of branched-chain acetate ester biosynthesis pathway. **(b)** The four submodules of the  
541 branched-chain acetate ester pathway designed for controlling selective microbial biosynthesis of  
542 acetate esters useful for various industries. **(c)** Optimization of isobutanol production module.  
543 Shown are the genetic architecture of the two isobutanol operons and characterization of isobutanol  
544 production by varying plasmid copy numbers (PCNs) in the engineered strains. Plasmid copy  
545 numbers of pRSF, pCDF, pET, and pACYC are >100, 20~40, 15~20, and 10~12, respectively. **(d)**  
546 Genetic architecture of operons designed for isoamyl acetate production and design validation.  
547 Each data in panels **(c)** and **(d)** represents a mean  $\pm$  1 standard deviation from at least three  
548 biological replicates.

549

550 **Figure 2.** Controlling selective microbial production of isoamyl acetate. **(a)** Systematic  
551 characterization and comparison of push-and-pull metabolic engineering strategies for selective  
552 microbial biosynthesis of isoamyl acetate over isobutyl acetate. **(b)** Selectivity of isoamyl acetate  
553 production by HSEC1006 and HSEC1210. **(c-d)** Accumulation of isobutanol and isoamyl alcohol  
554 by the engineered strains. **€** Comparison of cell growth of the engineered strains during 48 h  
555 culturing. Each data represents mean  $\pm$  1 standard deviation from at least three biological  
556 replicates.

557

558 **Figure 3.** Analysis of proteome reallocation of HSEC1210 growing in media with and without  
559 IPTG induction. **(a)** Cell growth. **(b)** A volcano plot comparing HSEC1210 proteomes at 24h. The  
560 red dots indicate the isoamyl acetate pathway proteins. **(c)** Proteomic fold-change of enzymes in

561 the isoamyl acetate pathway upon IPTG induction. **(d)** Mass fractions of the fueling pathways for  
562 generating precursor metabolites and energy and biosynthesis pathways of amino acid**(e)** Percent  
563 of change in amino acid reallocation in the proteome upon IPTG induction. **(f)** Metabolic map  
564 displaying protein fold-changes of enzymes in the central metabolism. Significance (pval) and  
565 abundance fold-change (diff) were presented by  $-\log_{10}(\text{p-value})$  and  $\log_2(\text{difference})$ , respectively.  
566 Each data represents mean  $\pm$  1 standard deviation from at least three biological replicates.

567

568 **Figure 4.** Alleviation of metabolic bottleneck and burden of the isoamyl acetate pathway by  
569 overexpression of CATec3 Y20F. **(a)** Genetic architecture of operons in the pCDFDuet-1 backbone  
570 plasmid of HSEC1210 and HSEC1311. In addition to having CATec3 Y20F in the pRSF plasmid  
571 like HSEC1210, HSEC1311 was designed to express additional CATec3 Y20F in the pCDF  
572 plasmid. **(b-d)** Comparison of cell growth **(b)** and production of isoamyl alcohol **(c)** and isoamyl  
573 acetate **(d)** by HSEC1210 and HSEC1311 after 48 h. **(e)** Percent of change in amino acid  
574 reallocation in the proteome upon additional expression of CATec3 Y20F. **(f)** Comparison of  
575 proteomic fold-changes of enzymes in the isoamyl acetate pathway between HSEC1210 and  
576 HSEC1311 at 24 h. **(g)** Mass fractions of the pathways for generating precursor metabolites and  
577 energy and biosynthesis pathways of amino acids in the proteomes. Each data represents mean  $\pm$   
578 1 standard deviation from at least three biological replicates.

579

580 **Figure 5.** Optimization of isoamyl acetate production. **(a)** Metabolic map displaying deletion of  
581 genes participating in pathways that might compete for isoamyl acetate biosynthesis. The red  
582 marks indicate gene deletions and their reactions. **(b)** Comparison of isoamyl acetate yield on  
583 glucose between the engineered strains. **(c)** Profiles of cell growth and accumulated isoamyl  
584 alcohol production during fed-batch culture by HSEC1412 and HSEC1614. **(d-e)** Kinetics of

585 glucose consumption, isobutyl acetate production, and isoamyl acetate production from fed-batch  
586 culture by **(d)** HSEC1412 and **(e)** HSEC1614. Each data represents mean  $\pm$  1 standard deviation  
587 from at least three biological replicates.

588 **Figure 1**

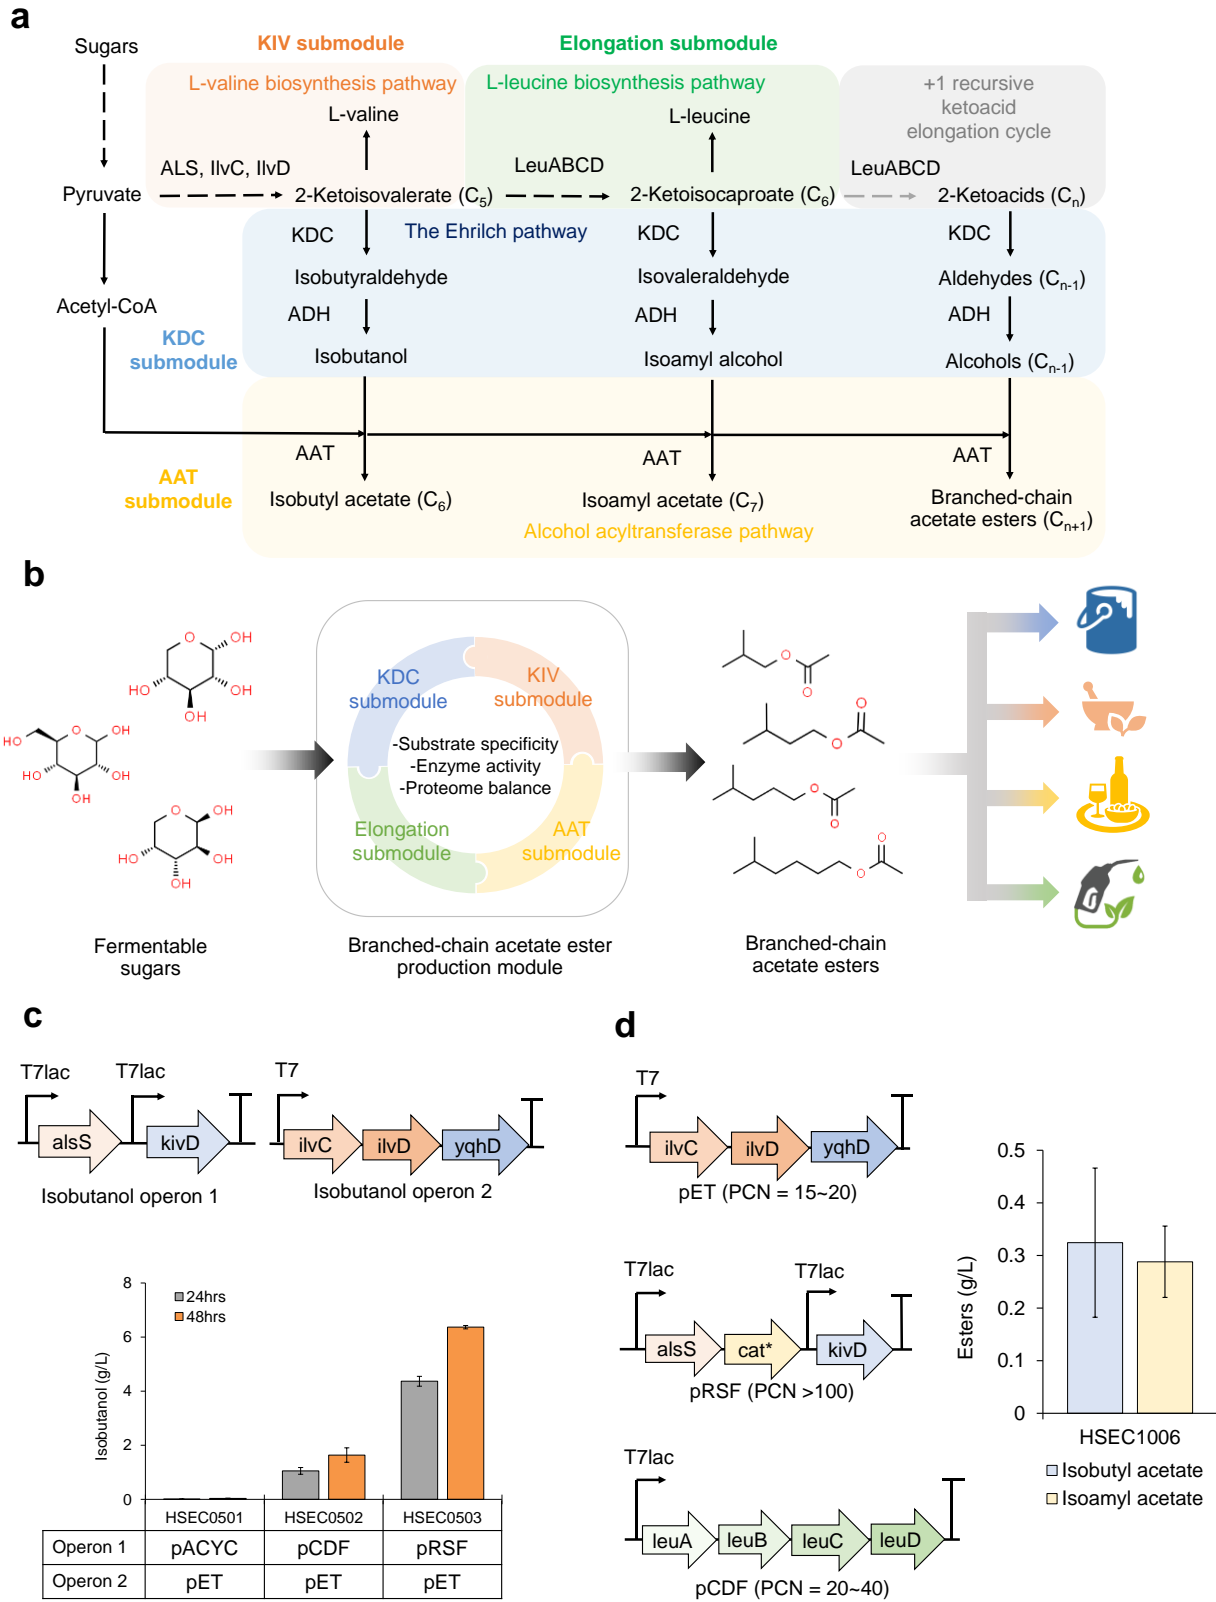

590 **Figure 2**

591

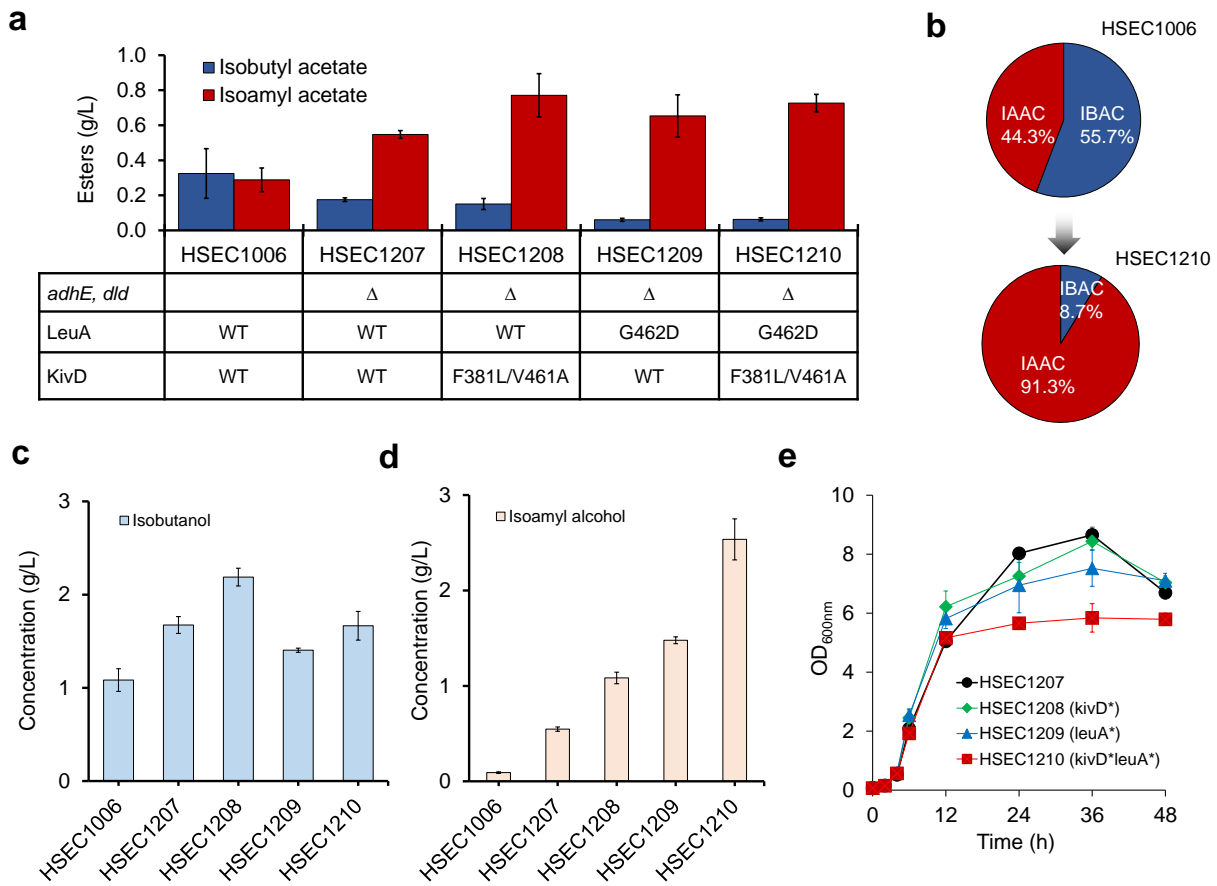

592

593 **Figure 3**

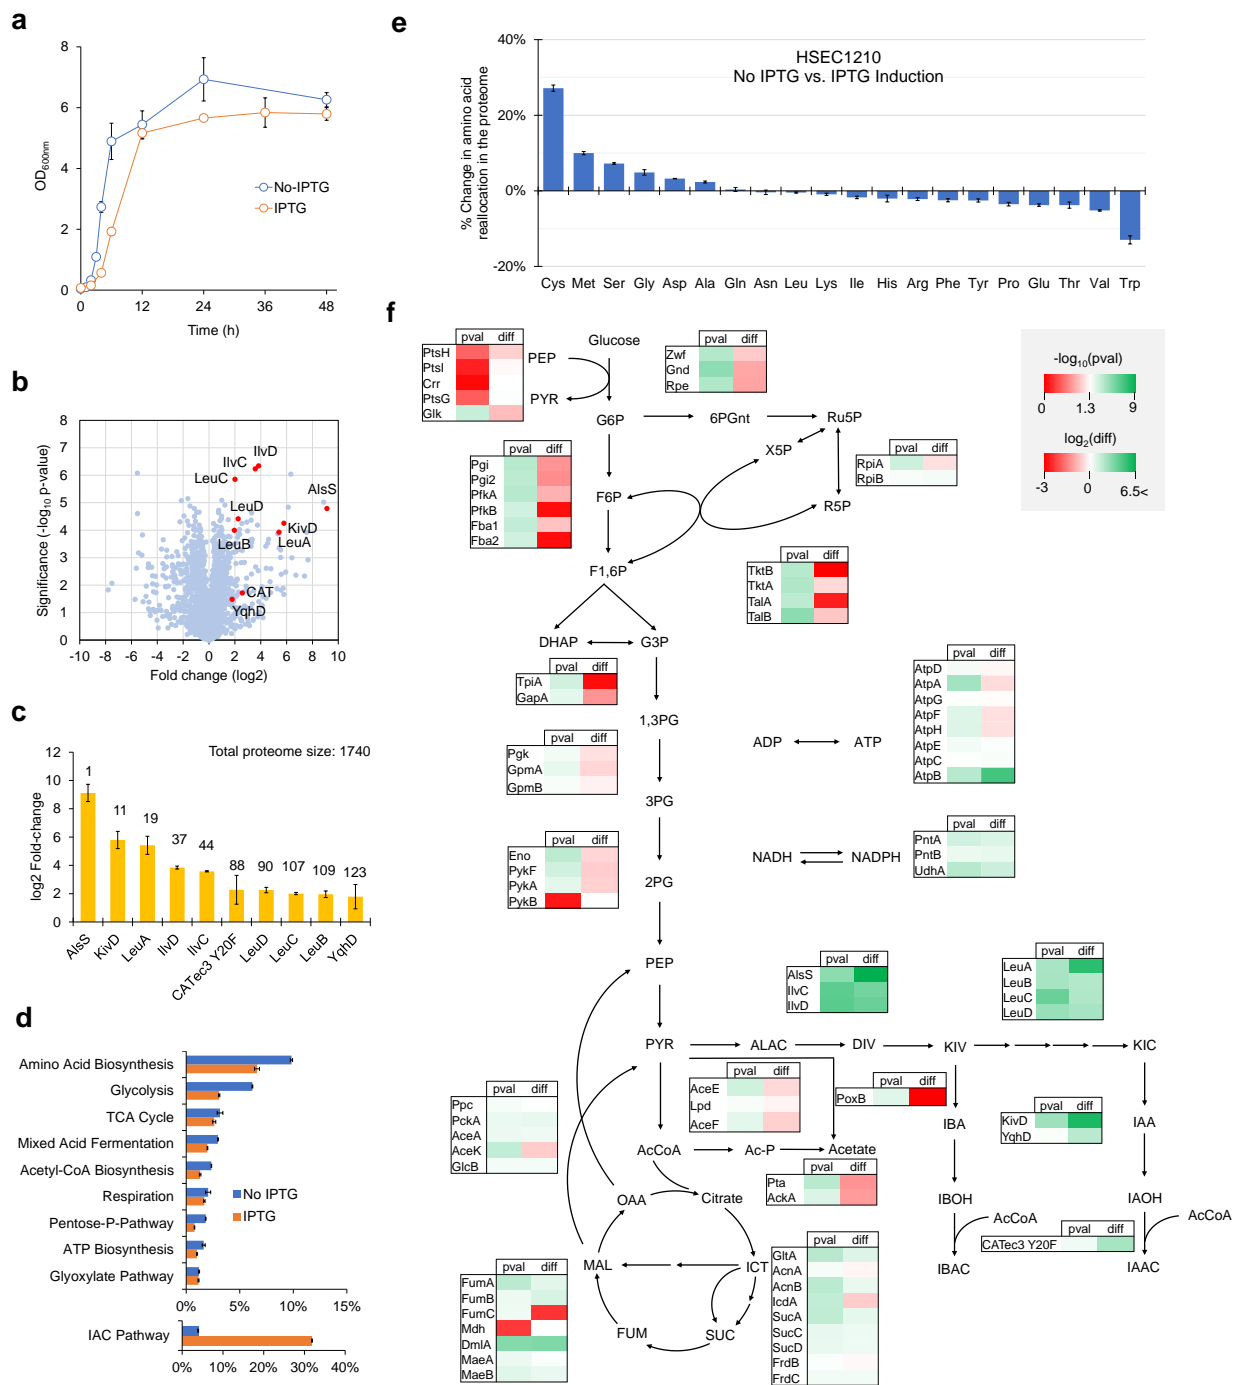

594



595 **Figure 4**

596

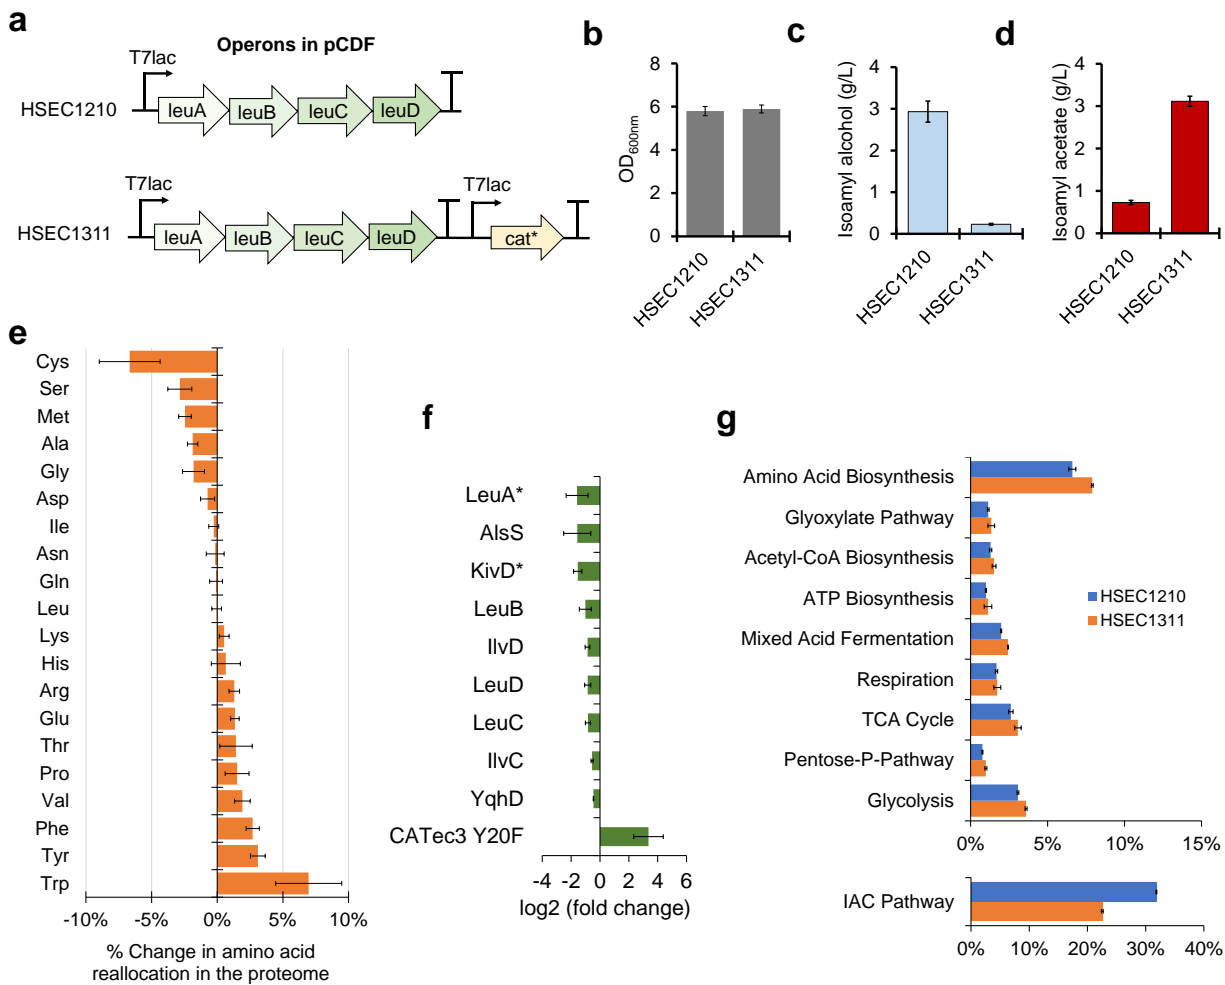

597

598

599 **Figure 5**

600

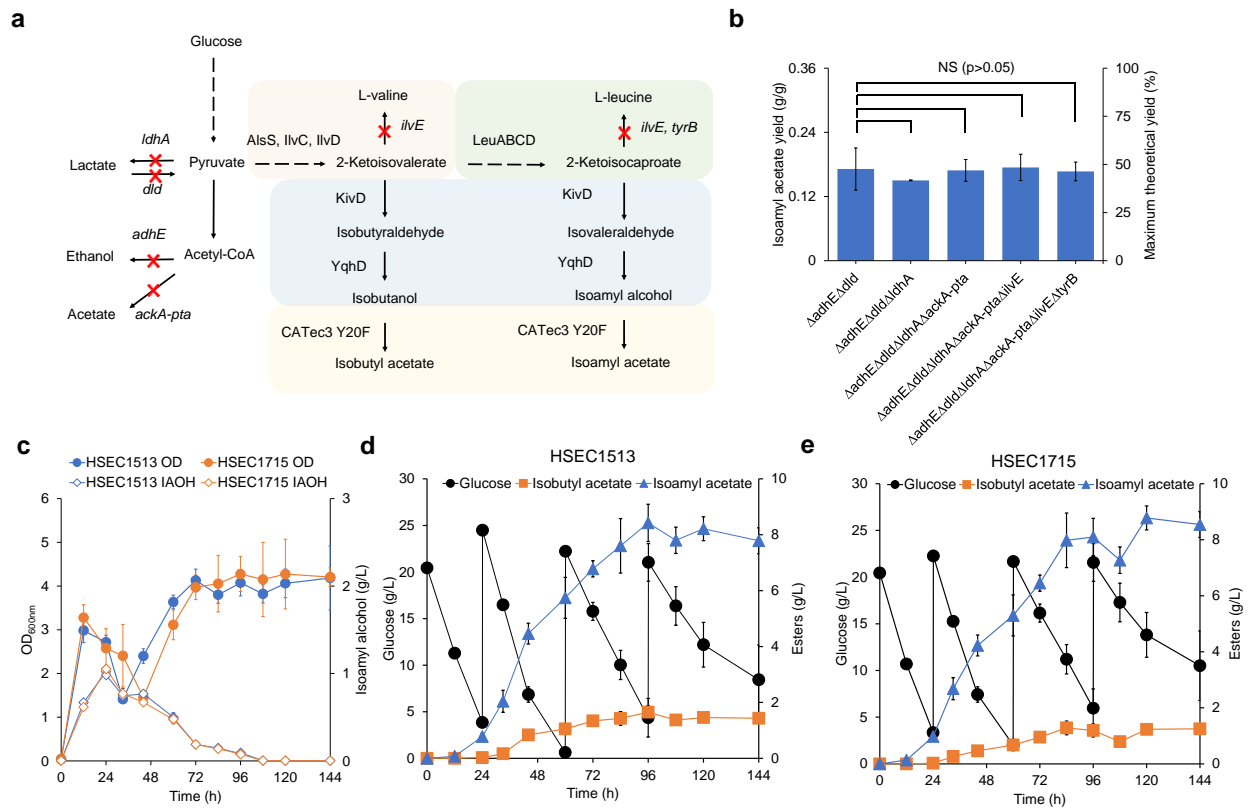

601

602

603

604

605 **REFERENCES**

- 606 Abe, F., Horikoshi, K., 2005. Enhanced production of isoamyl alcohol and isoamyl acetate by  
607 ubiquitination-deficient *Saccharomyces cerevisiae* mutants. *Cell Mol Biol Lett.* 10, 383-8.
- 608 Atsumi, S., Hanai, T., Liao, J. C., 2008. Non-fermentative pathways for synthesis of branched-  
609 chain higher alcohols as biofuels. *Nature.* 451, 86-89.
- 610 Caspi, R., Billington, R., Keseler, I. M., Kothari, A., Krummenacker, M., Midford, P. E., Ong, W.  
611 K., Paley, S., Subhraveti, P., Karp, P. D., The MetaCyc database of metabolic pathways  
612 and enzymes - a 2019 update.
- 613 Cherepanov, P. P., Wackernagel, W., 1995. Gene disruption in *Escherichia coli*: TcR and KmR  
614 cassettes with the option of Flp-catalyzed excision of the antibiotic-resistance determinant.  
615 *Gene.* 158, 9-14.
- 616 Clarkson, S. M., Giannone, R. J., Kridelbaugh, D. M., Elkins, J. G., Guss, A. M., Michener, J. K.,  
617 2017. Construction and Optimization of a Heterologous Pathway for Protocatechuate  
618 Catabolism in *Escherichia coli* Enables Bioconversion of Model Aromatic Compounds.  
619 *Appl Environ Microbiol.* 83.
- 620 Connor, M. R., Cann, A. F., Liao, J. C., 2010. 3-Methyl-1-butanol production in *Escherichia coli*:  
621 random mutagenesis and two-phase fermentation. *Appl Microbiol Biotechnol.* 86, 1155-  
622 64.
- 623 Connor, M. R., Liao, J. C., 2008. Engineering of an *Escherichia coli* strain for the production of  
624 3-methyl-1-butanol. *Appl Environ Microbiol.* 74, 5769-75.
- 625 Cumplido-Laso, G., Medina-Puche, L., Moyano, E., Hoffmann, T., Sinz, Q., Ring, L., Studart-  
626 Wittkowski, C., Caballero, J. L., Schwab, W., Munoz-Blanco, J., Blanco-Portales, R.,

- 627           2012. The fruit ripening-related gene FaAAT2 encodes an acyl transferase involved in  
628           strawberry aroma biogenesis. *J Exp Bot.* 63, 4275-90.
- 629   Datsenko, K. A., Wanner, B. L., 2000. One-step inactivation of chromosomal genes in *Escherichia*  
630           *coli* K-12 using PCR products. *Proc Natl Acad Sci U S A.* 97, 6640-5.
- 631   Datta, S., Costantino, N., Court, D. L., 2006. A set of recombineering plasmids for gram-negative  
632           bacteria. *Gene.* 379, 109-15.
- 633   de la Plaza, M., Fernandez de Palencia, P., Pelaez, C., Requena, T., 2004. Biochemical and  
634           molecular characterization of alpha-ketoisovalerate decarboxylase, an enzyme involved in  
635           the formation of aldehydes from amino acids by *Lactococcus lactis*. *FEMS Microbiol Lett.*  
636           238, 367-74.
- 637   Dellomonaco, C., Clomburg, J. M., Miller, E. N., Gonzalez, R., 2011. Engineered reversal of the  
638           beta-oxidation cycle for the synthesis of fuels and chemicals. *Nature.* 476, 355-9.
- 639   Garcia, S., Trinh, C. T., 2019. Multiobjective strain design: A framework for modular cell  
640           engineering. *Metab Eng.* 51, 110-120.
- 641   Gibson, D. G., Young, L., Chuang, R. Y., Venter, J. C., Hutchison, C. A., 3rd, Smith, H. O., 2009.  
642           Enzymatic assembly of DNA molecules up to several hundred kilobases. *Nat Methods.* 6,  
643           343-5.
- 644   Horton, C. E., Huang, K. X., Bennett, G. N., Rudolph, F. B., 2003. Heterologous expression of the  
645           *Saccharomyces cerevisiae* alcohol acetyltransferase genes in *Clostridium acetobutylicum*  
646           and *Escherichia coli* for the production of isoamyl acetate. *J Ind Microbiol Biotechnol.* 30,  
647           427-32.
- 648   IndustryARC, Isoamyl acetate market - industry analysis, market size, share, trends, application  
649           analysis, growth and forecast 2020 - 2025. 2019.
- 650   IndustryResearch, Global isoamyl acetate market research report 2021. 2021.

- 651 Iwasaki, T., Miyajima-Nakano, Y., Fukazawa, R., Lin, M. T., Matsushita, S. I., Hagiuda, E.,  
652 Taguchi, A. T., Dikanov, S. A., Oishi, Y., Gennis, R. B., 2021. Escherichia coli amino acid  
653 auxotrophic expression host strains for investigating protein structure-function  
654 relationships. *J Biochem.* 169, 387-394.
- 655 Knudsen, J. T., Tollsten, L., 1993. Trends in floral scent chemistry in pollination syndromes: floral  
656 scent composition in moth-pollinated taxa. *Botanical Journal of the Linnean Society.* 113,  
657 263-284.
- 658 Kosinski, M. J., Rinas, U., Bailey, J. E., 1992. Isopropyl- $\beta$ -d-thiogalactopyranoside influences the  
659 metabolism of Escherichia coli. *Applied Microbiology and Biotechnology.* 36, 782-784.
- 660 Lange, J. P., Price, R., Ayoub, P. M., Louis, J., Petrus, L., Clarke, L., Gosselink, H., 2010. Valeric  
661 biofuels: a platform of cellulosic transportation fuels. *Angew Chem Int Ed Engl.* 49, 4479-  
662 83.
- 663 Layton, D. S., Trinh, C. T., 2014. Engineering modular ester fermentative pathways in Escherichia  
664 coli. *Metab Eng.* 26, 77-88.
- 665 Layton, D. S., Trinh, C. T., 2016a. Expanding the modular ester fermentative pathways for  
666 combinatorial biosynthesis of esters from volatile organic acids. *Biotechnology and*  
667 *bioengineering.*
- 668 Layton, D. S., Trinh, C. T., 2016b. Microbial synthesis of a branched-chain ester platform from  
669 organic waste carboxylates. *Metabolic Engineering Communications.* 3, 245-251.
- 670 Lechner, A., Brunk, E., Keasling, J. D., 2016. The Need for Integrated Approaches in Metabolic  
671 Engineering. *Cold Spring Harb Perspect Biol.* 8.
- 672 Lee, J.-W., Trinh, C. T., 2020. Towards renewable flavors, fragrances, and beyond. *Current*  
673 *Opinion in Biotechnology.* 61, 168-180.

- 674 Liu, Y., Chen, S., Chen, J., Zhou, J., Wang, Y., Yang, M., Qi, X., Xing, J., Wang, Q., Ma, Y.,  
675 2016. High production of fatty alcohols in *Escherichia coli* with fatty acid starvation.  
676 *Microbial cell factories*. 15, 1-10.
- 677 Mak, W. S., Tran, S., Marcheschi, R., Bertolani, S., Thompson, J., Baker, D., Liao, J. C., Siegel,  
678 J. B., 2015. Integrative genomic mining for enzyme function to enable engineering of a  
679 non-natural biosynthetic pathway. *Nat Commun*. 6, 10005.
- 680 Marcheschi, R. J., Li, H., Zhang, K., Noey, E. L., Kim, S., Chaubey, A., Houk, K. N., Liao, J. C.,  
681 2012. A synthetic recursive "+1" pathway for carbon chain elongation. *ACS Chem Biol*. 7,  
682 689-97.
- 683 Martin, V. J., Pitera, D. J., Withers, S. T., Newman, J. D., Keasling, J. D., 2003. Engineering a  
684 mevalonate pathway in *Escherichia coli* for production of terpenoids. *Nat Biotechnol*. 21,  
685 796-802.
- 686 Mason, A. B., Dufour, J. P., 2000. Alcohol acetyltransferases and the significance of ester  
687 synthesis in yeast. *Yeast*. 16, 1287-98.
- 688 Mikhail Markovich Gusyatiner, M. G. L., Yuly Ivanovich Kozlov, Lirina Valerievna Ivanovskaya,  
689 Elvira Borisovna Voroshilova, DNA coding for mutant isopropylmalate synthase L-  
690 leucine-producing microorganism and method for producing L-leucine. Ajinomoto Co Inc,  
691 United States, 1999.
- 692 Miller, G. L., 1959. Use of Dinitrosalicylic Acid Reagent for Determination of Reducing Sugar.  
693 *Anal Chem*. 31, 426-428.
- 694 Nancolas, B., Bull, I. D., Stenner, R., Dufour, V., Curnow, P., 2017. *Saccharomyces cerevisiae*  
695 Atf1p is an alcohol acetyltransferase and a thioesterase in vitro. *Yeast*. 34, 239-251.
- 696 Neidhardt, F. C., Ingraham, J. L., Schaechter, M., 1990. *Physiology of the bacterial cell : a*  
697 *molecular approach*. Sinauer Associates, Sunderland, Mass.

- 698 Rodriguez, G. M., Tashiro, Y., Atsumi, S., 2014. Expanding ester biosynthesis in *Escherichia coli*.  
699 Nat Chem Biol. 10, 259-65.
- 700 Seo, H., Lee, J. W., Giannone, R. J., Dunlap, N. J., Trinh, C. T., 2021. Engineering promiscuity of  
701 chloramphenicol acetyltransferase for microbial designer ester biosynthesis. *Metab Eng.*  
702 66, 179-190.
- 703 Seo, H. M., Jeon, J. M., Lee, J. H., Song, H. S., Joo, H. B., Park, S. H., Choi, K. Y., Kim, Y. H.,  
704 Park, K., Ahn, J., Lee, H., Yang, Y. H., 2016. Combinatorial application of two aldehyde  
705 oxidoreductases on isobutanol production in the presence of furfural. *J Ind Microbiol*  
706 *Biotechnol.* 43, 37-44.
- 707 Sharan, S. K., Thomason, L. C., Kuznetsov, S. G., Court, D. L., 2009. Recombineering: a  
708 homologous recombination-based method of genetic engineering. *Nat Protoc.* 4, 206-23.
- 709 Steinmetz, A., Vyazmensky, M., Meyer, D., Barak, Z. E., Golbik, R., Chipman, D. M., Tittmann,  
710 K., 2010. Valine 375 and phenylalanine 109 confer affinity and specificity for pyruvate as  
711 donor substrate in acetohydroxy acid synthase isozyme II from *Escherichia coli*.  
712 *Biochemistry.* 49, 5188-99.
- 713 Sugimoto, N., Engelgau, P., Jones, A. D., Song, J., Beaudry, R., 2021. Citramalate synthase yields  
714 a biosynthetic pathway for isoleucine and straight-and branched-chain ester formation in  
715 ripening apple fruit. *Proceedings of the National Academy of Sciences.* 118.
- 716 Sumbly, K. M., Grbin, P. R., Jiranek, V., 2010. Microbial modulation of aromatic esters in wine:  
717 Current knowledge and future prospects. *Food chemistry.* 121, 1-16.
- 718 Tai, Y. S., Xiong, M., Zhang, K., 2015. Engineered biosynthesis of medium-chain esters in  
719 *Escherichia coli*. *Metab Eng.* 27, 20-28.

- 720 Taverner, T., Karpievitch, Y. V., Polpitiya, A. D., Brown, J. N., Dabney, A. R., Anderson, G. A.,  
721 Smith, R. D., 2012. DanteR: an extensible R-based tool for quantitative analysis of -omics  
722 data. *Bioinformatics*. 28, 2404-6.
- 723 Tyanova, S., Temu, T., Sinitcyn, P., Carlson, A., Hein, M. Y., Geiger, T., Mann, M., Cox, J., 2016.  
724 The Perseus computational platform for comprehensive analysis of (prote)omics data. *Nat*  
725 *Methods*. 13, 731-40.
- 726 Ulm, E. H., Bohme, R., Kohlhaw, G., 1972. Alpha-isopropylmalate synthase from yeast:  
727 purification, kinetic studies, and effect of ligands on stability. *J Bacteriol*. 110, 1118-26.
- 728 UniProt, C., 2021. UniProt: the universal protein knowledgebase in 2021. *Nucleic Acids Res*. 49,  
729 D480-D489.
- 730 Vadali, R. V., Bennett, G. N., San, K. Y., 2004a. Applicability of CoA/acetyl-CoA manipulation  
731 system to enhance isoamyl acetate production in *Escherichia coli*. *Metab Eng*. 6, 294-9.
- 732 Vadali, R. V., Horton, C. E., Rudolph, F. B., Bennett, G. N., San, K. Y., 2004b. Production of  
733 isoamyl acetate in *ackA-pta* and/or *ldh* mutants of *Escherichia coli* with overexpression of  
734 yeast ATF2. *Appl Microbiol Biotechnol*. 63, 698-704.
- 735 Walker, C., Dien, B., Giannone, R. J., Slininger, P., Thompson, S. R., Trinh, C. T., 2021. Exploring  
736 Proteomes of Robust *Yarrowia lipolytica* Isolates Cultivated in Biomass Hydrolysate  
737 Reveals Key Processes Impacting Mixed Sugar Utilization, Lipid Accumulation, and  
738 Degradation. *mSystems*. 6, e0044321.
- 739 Wiegel, J., Schlegel, H. G., 1977. Alpha-isopropylmalate synthase from *Alcaligenes eutrophus* H  
740 16. III. Endproduct inhibition and its relief by valine and isoleucine. *Arch Microbiol*. 114,  
741 203-10.
- 742 Wilbanks, B., Layton, D. S., Garcia, S., Trinh, C. T., 2018. A Prototype for Modular Cell  
743 Engineering. *ACS Synth Biol*. 7, 187-199.



- 744 Wilbanks, B., Trinh, C. T., 2017a. Comprehensive characterization of toxicity of fermentative  
745 metabolites on microbial growth. *Biotechnol Biofuels*. 10, 262.
- 746 Wilbanks, B., Trinh, C. T., 2017b. Comprehensive characterization of toxicity of fermentative  
747 metabolites on microbial growth. *Biotechnology for Biofuels*. 10, 262.
- 748 Wu, G., Yan, Q., Jones, J. A., Tang, Y. J., Fong, S. S., Koffas, M. A. G., 2016. Metabolic Burden:  
749 Cornerstones in Synthetic Biology and Metabolic Engineering Applications. *Trends*  
750 *Biotechnol*. 34, 652-664.
- 751 Youngquist, J. T., Schumacher, M. H., Rose, J. P., Raines, T. C., Politz, M. C., Copeland, M. F.,  
752 Pflieger, B. F., 2013. Production of medium chain length fatty alcohols from glucose in  
753 *Escherichia coli*. *Metabolic engineering*. 20, 177-186.
- 754 Zhang, K., Sawaya, M. R., Eisenberg, D. S., Liao, J. C., 2008. Expanding metabolism for  
755 biosynthesis of nonnatural alcohols. *Proceedings of the National Academy of Sciences*.  
756 105, 20653-20658.
- 757
